# Supplementary material
Source: Springer Nature journal article supplement (https://www.springermedizin.de/resource/supplementary/12879_2005_355_MOESM2_ESM.pdf/9448846)

**Cell count**  
**X 10<sup>6</sup>**

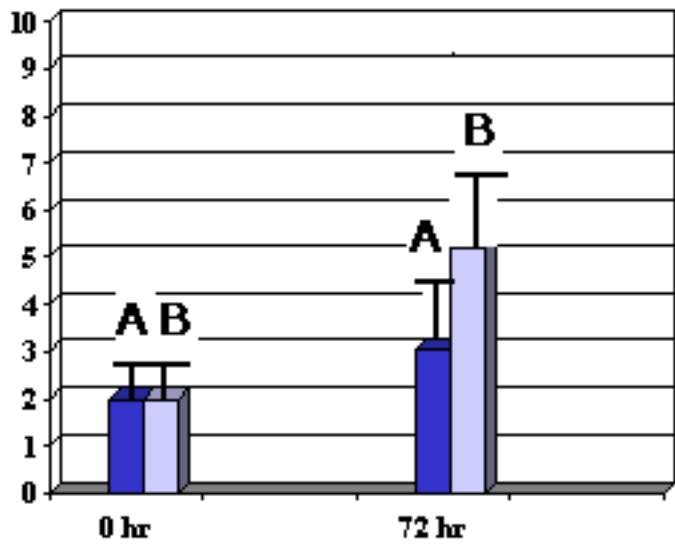

**Culture time**

Supplement: MOESM2 [file 9448846]
